# Supplementary material for: Parallelism of Chemicostructural Properties between Filgrastim Originator and Three of Its Biosimilar Drugs
Source: Hindawi journal article supplement (doi:10.1155/2019/2751461), 2019-02-27
Supplement: f1 [file 2751461.f1.docx]

Supplementary Materials

Parallelism of chemico-structural properties between filgrastim originator and three of its biosimilar drugs.

Alessandra Gianoncelli#, Michela Bertuzzi#, Michela Guarienti #, Sara Vezzoli, Sara Bonini, Andrea Mastinu*, Sandra Sigala and Maurizio Memo

Department of Molecular and Translational Medicine, University of Brescia, Viale Europa, 11, Brescia, Italy

*Corresponding author

[andrea.mastinu@unibs.it](mailto:andrea.mastinu@unibs.it)

Department of Molecular and Translational Medicine,

University of Brescia,

Viale Europa, 11, Brescia, Italy

#Authors equally contributed to this work

Figures

Figure S1: Calibration curve and correlation coefficient obtained from analysis of filgrastim reference standard. Five different dilutions of the filgrastim reference standard (340.00 μg/ml; 170.00 μg/ml; 85.00 μg/ml; 42.50 μg/ml; 21.25 μg/ml) were analyzed by RP-HPLC-UV. The calibration curve was plotted using the area under peak versus filgrastim standard reference concentrations.


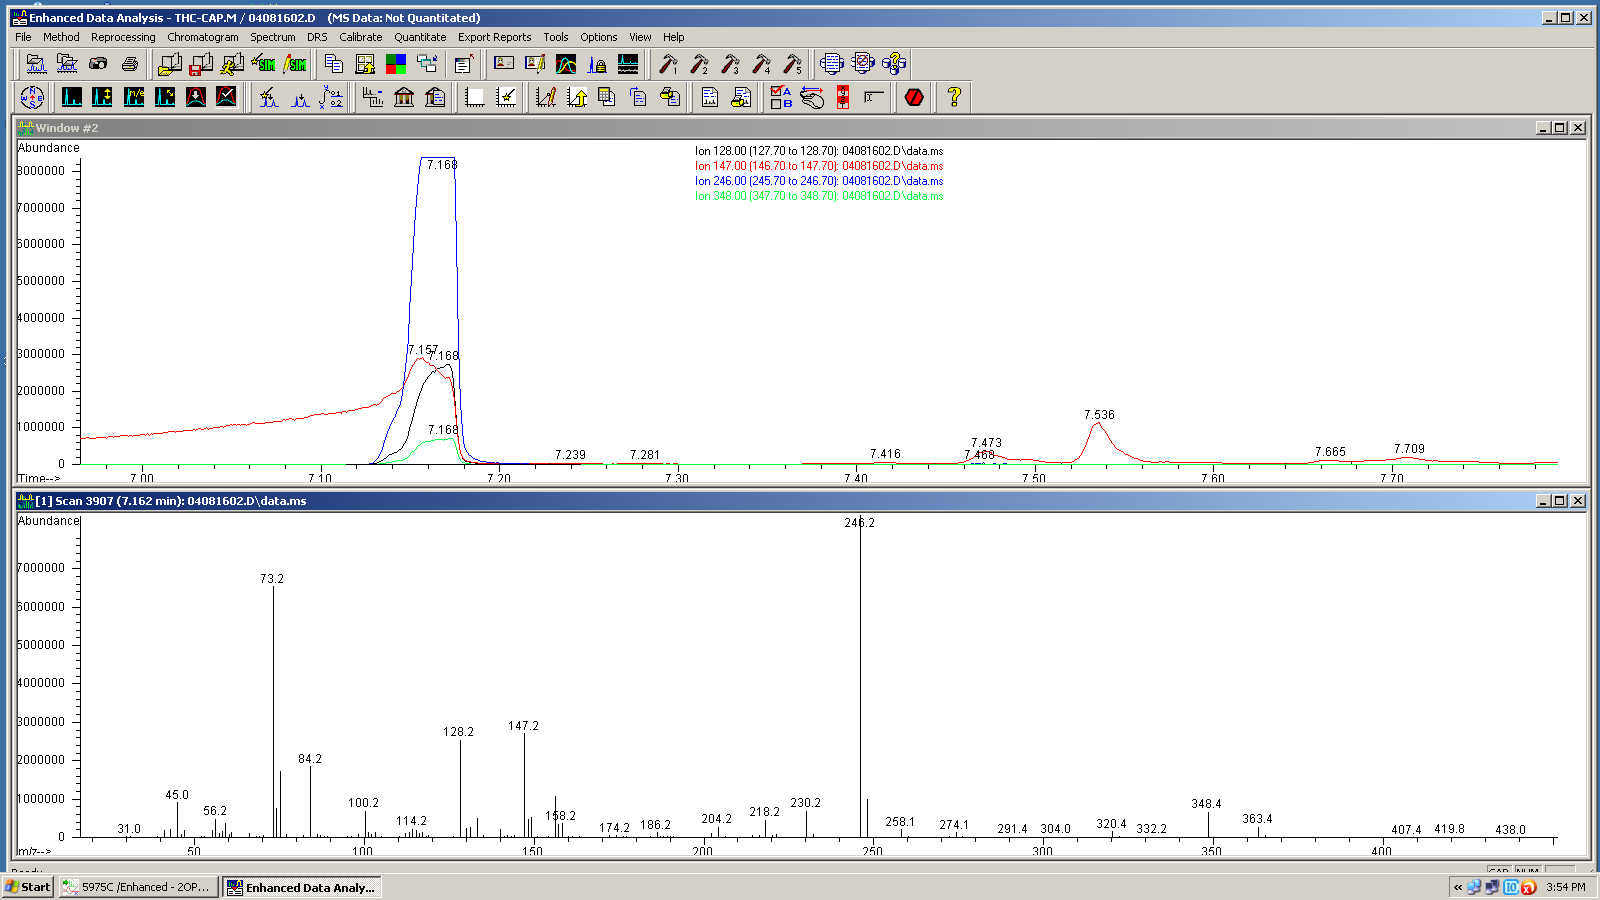


B

A

Figure S2: GC-MS spectrum of the second minor peak found only in ZAR formulation and recovered during RP-HPLC analysis. In A is reported the chromatogram, while in B the related mass spectrum.


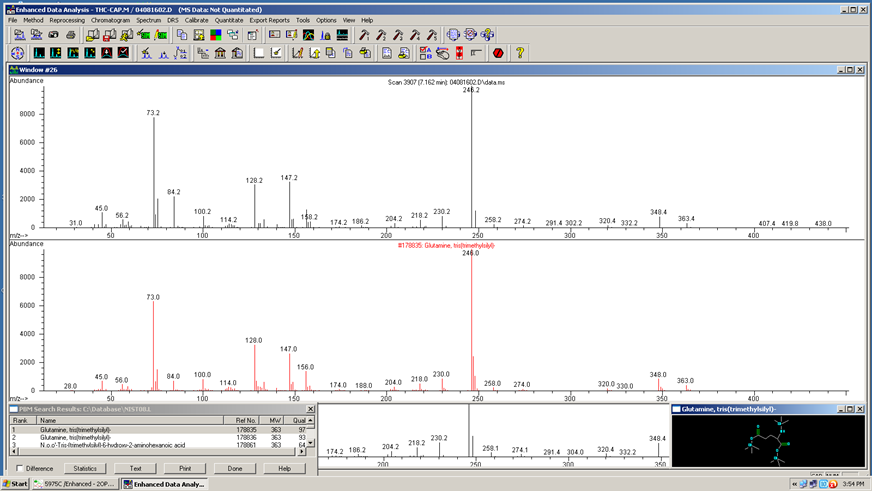


A

B

Figure S3: Peak identification by comparing the experimental mass spectrum against mass spectra in a specific library. In A is reported the mass spectrum of the unknown peak, while in B the mass spectrum matched in the library and corresponding to the glutamic acid.

min

mAu

GRA

ZAR

TEV

NIV

Figure S4: Quantitative RP-HPLC-UV analyses of Granulokine® (GRA), Tevagrastim® (TEV), NivestimTM (NIV) and Zarzio® (ZAR). Each drug was injected two times; the chromatogram shows in blue the first analysis and in black the second one.

Tables

Table S1: data analysis of quantitative double analyses of Granulokine® (GRA), Tevagrastim® (TEV), NivestimTM (NIV) and Zarzio® (ZAR), and relative average and recovery calculation. Each drug was injected two times, in blue the values of the first analysis and in black the values of second one.

Table S2: Matrix-assisted laser desorption/ionization time-of-flight/time-of-flight mass spectrometry (MALDI TOF/TOF-MS)-positive ion spectrum of Granulokine® (GRA) and its biosimilars, Tevagrastim® (TEV), NivestimTM (NIV) and Zarzio® (ZAR) after endoproteinase Glu-C, in not-reducing condition, and chymotrypsin digestion and purification with Zip-tip C18
